# Supplementary material
Source: publisher site journal article supplement (https://static.cambridge.org/content/id/urn:cambridge.org:id:article:S0899823X20000756/resource/name/S0899823X20000756supp004.docx)
Supplement: Supplementary file 1 [file S0899823X20000756supp004.docx]

**Appendix 2. List of antibiotic categorization.**

| **Antibiotic spectrum** | **Type of agent** | **Antibiotic name** |
| --- | --- | --- |
| Broad-spectrum antibiotics | Anti-MRSA agents | Teicoplanin (Targocid) TCPL,Vancomycin (Vancocyn/ Lyphocin) VANC, Linezolid (Zyvox) LNZD, Daptomycin (Cubicin) DAPT, Mupirocin (Bactroban) MPRC |
| Broad non-fluoroquinolones | Carbenicillin Indanyl (Pyopen/ Geogen/Geocillin) CARB, Mezlocillin (Mezlin) MZLO, Piperacillin (Pipracil) PIPR, Ticarcillin (Ticar) TICR, Amoxicillin-Clavulanic Acid (Augmentin) AMCL, Ampicillin- Sulbactam (Unasyn) AMSU, Piperacillin+Tazobactam (Zozyn) PIPT, Ticarcillin+Clavulanic Acid (Timentin) TICL, Cefdinir (Omnicef) 1DNR, Cephradine (Velocef) 1RDN, Cefaclor (Ceclor/ Ceclor CD) 2CLR, Cefamandol (Mandol) 2MDL, Cefonicid (Monocid) 2NCD, Cefoperazone (Cefobid) 2PRZ, Cefotetan (Cefotan) 2TTN, Cefoxitin (Mefoxin) 2XTN, Cefprozil (Cefzil) 2PZL, Ceftmetazole (Zefazone) 2MTZ, Cefuroxime (Kefurox/ Zinacef) 2RXM, Cefuroxime axetil (Ceftin) 2XMA, Loracarbeff (Lorabid) 2LCB, Ceftibuten (Cedax) 3BTN, Cefixime (Suprax) 3FXM, Cefpodoxine proxetil (Vantin) 3PDX, Ceftazidime (Ceptaz/ Fortaz/ Tanicef)3ZDM, Ceftizoxime (Cefizox) 3ZXM, Ceftriaxone (Rocephin) 3AXN, Cefepime (Maxipime) 4FPM, Ceftobiprole (Medocaril) 4TBP, Azithromycin (Zithromax/ Z-Pak) AZTH, Clarithromyin (Biaxin) CRTH, Clindamycin (Cleocin) CLIN, Dirithromycin (Dynabac) DRTH, Erythromycin (E-mycin/ Ery-tab/ Benzamycin) ERYT, Lincomycin (Lincocin) LNCO, Telithromycin (Ketek) KTEK, Imipenem-Cilastatin (Primaxin) IMIC, Meropenem (Merrem) MRP, Ertapenem (Invanz) ERTA, Aztreonam (Azactam) AZTR, Rifabutin (Mycobutin) RFBT, Rifampin (Rifadin) RFMP, Quinopristin+Dalfopristin (Synercid) SYNR, Chloramphenicol (Chloromycetin) CLAM, Colistemetate (Coly-Mycin M&S) CLTM, Spectinomycin (Trobicin) SPTM, Polymyxin B/ Bacitracin/ & Neomycin (Triple Antibiotic Ointment) TABO |
| Fluoroquinolones | Cinoxacin (Cinoxacin) CNXC, Ciprofloxacin (Cipro) CPFX, Enoxacin (Penetrex) ENXC, Gatifloxacin (Tequin) GTFX, Levofloxacin (Levaquin/ Quixin) LVFX, Lomefloxacin (Maxaquin) LMFX, Moxifloxacin (Avelox) MXFX, Nalidixic acid (NegGam) NALA, Norfloxacin (Noroxin) NFXN, Ofloxacin (Floxin) OFXN, Sparfloxacin (Zagam) SFXN, Trovafloxacin (Trovan) TVFN |
| Narrow-spectrum antibiotics | Narrow non-fluoroquinolones | Amoxicillin (Amoxil) AMOX, Ampicillin (Omnipen) AMPI, Bacampicillin (Spectrobid) BACA, Benzylpenicillin (Benpen) BNZP, Cloxacillin (Tegopen/ Coxapen) CLOX, Dicloxacillin (Dycill/ Dynapen/ Pathocil) DCLX, Methicillin (Staphcillin) MTHC, Oxacillin (Prostaphilin/ Bactocil) OXAC, Penicillin G (Benzathine Potassium/ Procaine)(Bicillin C-R/L-A/ P􀃙zerpen Wycellin) PENG, Penicillin V (Pen-VK/ Beepen-VK) PENK, Cefadroxil (Duricef) 1DRX, Cefazolin (Ancef/ Kefzol/ Zolicef) 1ZLN, Cephalexin (Keflex/ Keftal/ Cefanox) 1LXN, Cephalotin (Keflin) 1LTN, Cephapirin (Cefadyl) 1PRN, Amikacin (Amikin) AMIK, Gentamicin (Garamycin) GENT, Kanamycin (Kantrex) KANA, Neomycin (Mycifradine/ Neo-Fradin) NEOM, Netilmicin (Netromycin) NETI, Streptomycin (Streptomycin) STRP, Tobramycin (Tobrex/ Nebcin) TOBR, Demedocycline (Declomycin) DEME, Doxycycline (Doxy/ Vibra/ Vibramycin) DOXY, Methacycline (Rondomycin) MCYC, Minocycline (Minocin) MINO, Oxytetracycline (Terramycin) OXYT, Tetracycline (Sumycin) TETR, Mafenide (Sulfamylon) MFND, Silver Sulfadiazine (SSD/ Silvadene) SSDZ, Sulfacetamide (Sultrim) SCTM, Sulfadiazine (Sulfadiazine) SDZN, Sulfamethoxazole (Gantanol) SMXZ, Sulfasalazine (Sulfasalazine/ Azulfidine) SSLZ, Sulfisoxazole (Sulfisoxazole) SSXZ, Trimethoprim- Sulfamethoxazole (Bactrim/Septra/ Cofatrim/Primsol ) TMPS, Bacitracin (Baci-IM) BACI, Fosfomycin (Monural) FFMC, INH - Isoniazid (Rifamate/ Nydrazid) INHR, Methenamine (Hiprex/ Mandelamine) MNMN, Metronidazol (Flagyl) FLGL, Nitrofurantoin (Macrobid/ Macrodantin/Furantoin) NTFN, Nitrofurazone (Furacin) NTFZ, Novobiocin (Albamycin) NVBC, Polymyxin (Aerospin) PMXN, Trimethoprim (Proloprim/ Trimpex) TMPM |
